1 **Title:**

2 Determining causal genes from GWAS signals using topologically associating domains

3

4 **Authors:**

5 Gregory P. Way<sup>1,2</sup>, Daniel W. Youngstrom<sup>3</sup>, Kurt D. Hankenson<sup>3</sup>, Casey S. Greene<sup>2\*</sup>, and  
6 Struan F.A. Grant<sup>4,5\*</sup>

7 \* These authors directed this work jointly

8

9 **Affiliations:**

10 <sup>1</sup>Genomics and Computational Biology Graduate Program, University of Pennsylvania,  
11 Philadelphia, PA 19104, USA

12 <sup>2</sup>Department of Systems Pharmacology and Translational Therapeutics, University of  
13 Pennsylvania, Philadelphia, PA 19104, USA

14 <sup>3</sup>Department of Small Animal Clinical Sciences, College of Veterinary Medicine, Michigan  
15 State University, East Lansing, MI 48824, USA

16 <sup>4</sup>Department of Pediatrics, Perelman School of Medicine, University of Pennsylvania,  
17 Philadelphia, PA 19104, USA

18 <sup>5</sup>Division of Human Genetics, Division of Endocrinology and Diabetes, The Children's  
19 Hospital of Philadelphia, Philadelphia, PA 19104, USA

20

21 **Author Emails:**

22 GPW: gregway@mail.med.upenn.edu; DWY: dwy@msu.edu; KDH: kdhan@msu.edu;

23 CSG: csgreene@mail.med.upenn.edu; \*SFAG: grants@email.chop.edu

24 **Co-Corresponding Authors:\***

Struan F.A. Grant

Casey S. Greene

Rm 1102D, 3615 Civic Center Blvd

10-131 SCTR 34th and Civic Center Blvd,

Philadelphia, PA 19104

Philadelphia, PA 19104

Office: 267-426-2795

Office: 215-573-2991

Fax: 215-590-1258

Fax: 215-573-9135

25

26 **Abstract:**

27 *Background*

28 Genome wide association studies (GWAS) have contributed significantly to the field of  
29 complex disease genetics. However, GWAS only report signals associated with a given trait and  
30 do not necessarily identify the precise location of culprit genes. As most association signals  
31 occur in non-coding regions of the genome, it is often challenging to assign genomic variants to  
32 the underlying causal mechanism(s). Topologically associating domains (TADs) are primarily  
33 cell-type independent genomic regions that define interactome boundaries and can aid in the  
34 designation of limits within which a GWAS locus most likely impacts gene function.

35 *Results*

36 We describe and validate a computational method that uses the genic content of TADs to  
37 assign GWAS signals to likely causal genes. Our method, called “TAD\_Pathways”, performs a  
38 Gene Ontology (GO) analysis over all genes that reside within the boundaries of all TADs  
39 corresponding to the GWAS signals for a given trait or disease. We applied our pipeline to the  
40 GWAS catalog entries associated with bone mineral density (BMD), identifying ‘Skeletal  
41 System Development’ (Benjamini-Hochberg adjusted  $p = 1.02 \times 10^{-5}$ ) as the top ranked pathway.  
42 Often, the causal gene identified at a given locus was well known and/or the nearest gene to the  
43 sentinel SNP. In other cases, our method implicated a gene further away. Our molecular

44 experiments describe a novel example: *ACP2*, implicated at the canonical ‘*ARHGAP1*’ locus. We  
45 found *ACP2* to be an important regulator of osteoblast metabolism, whereas a causal role of  
46 *ARHGAP1* was not supported.

#### 47 *Conclusions*

48 Our results demonstrate how basic principles of three-dimensional genome organization can  
49 help define biologically informed windows of signal association. We anticipate that  
50 incorporating TADs will aid in refining and improving the performance of a variety of  
51 algorithms that linearly interpret genomic content.

52

#### 53 **Keywords:**

54 Genome wide association study, gene prioritization, topologically associating domains,  
55 pathway analysis, bone mineral density

56

#### 57 **Background:**

58 Genome-wide association studies (GWAS) have been applied to over 300 different traits,  
59 leading to the discovery and subsequent validation of several important disease associations [1].  
60 However, GWAS can only discover association signals in the data. Subsequent assignment of  
61 signal to causal genes has proven difficult due to these signals falling principally within  
62 noncoding genomic regions [2–4] and not necessarily implicating the nearest gene [5]. For  
63 example, a signal found within an intron for *FTO*, a well-studied gene previously thought to be  
64 important for obesity [6], has been shown to physically interact with and lead to the differential  
65 expression of two genes (*IRX3* and *IRX5*) directly next to this gene, and not *FTO* itself [7–9].  
66 Moreover, there is evidence suggesting a type 2 diabetes GWAS association previously  
67 implicating *TCF7L2* [10] also influences the nearby *ACSL5* gene [11]. It remains unclear how

68 pervasive these kinds of associations are, but similar strategies are necessary in order for GWAS  
69 to better guide research and precision medicine [12].

70 Three-dimensional genomics has changed the way geneticists think about genome  
71 organization and its functional implications [13,14]. Genome-wide chromatin interaction maps  
72 have facilitated the development of several genome organization principles, including  
73 topologically associating domains (TADs) [15–18]. TADs are sub-architectural units of the  
74 overall genome organization that have consistent and functionally important genomic element  
75 distributions including an enrichment of housekeeping genes, insulator elements, and early  
76 replication timing regions at boundary regions [19–21]. TADs are largely consistent across  
77 different cell types and demonstrate synteny [22,23]. These observations can therefore allow the  
78 leveraging of TADs to set the bounds of where non-coding causal variants can most likely  
79 impact promoters, enhancers and genes in a tissue independent fashion [24,25]. Therefore, we  
80 sought to develop a method that integrates GWAS data with interactome boundaries to more  
81 accurately map signals to the mostly likely candidate gene(s).

82 We developed a computational approach, called “TAD\_Pathways”, which is agnostic to gene  
83 locations relative to each GWAS signal within TADs. We scanned publically available GWAS  
84 data for given traits and used TAD boundaries to output lists of genes likely to be causal. We  
85 demonstrate this approach by assessing the influence of GWAS signals on bone mineral density  
86 (BMD) [26–29]. This trait is clinically of great importance as low BMD is an important  
87 precursor to osteoporosis, a disease condition affecting millions of patients annually [30]. We  
88 also chose BMD as a trait for analysis because BMD GWAS primarily points to very well-  
89 known genes involved in bone development (positive controls) but there remain a number of  
90 established loci where no obvious gene resides, therefore offering the opportunity to uncover

91 novel biology. After applying our TAD\_Pathways discovery approach, we investigated putative  
92 causal genes using cell culture-based assays, identifying *ACP2* as a novel regulator of osteoblast  
93 metabolism.

94

## 95 **Results:**

### 96 *The Genomic Landscape of SNPs across Topologically Associating Domains*

97 We observed a consistent and non-random distribution of SNPs across TADs derived from  
98 human embryonic stem cells (hESC), human fibroblasts (IMR90), mouse embryonic stem cells  
99 (mESC), and mouse cortex cells (mcortex) cells. As expected, SNPs are tightly associated with  
100 TAD length for each cell type, but there are substantial outlier TADs (**Figure 1**). For example,  
101 the TAD harboring the largest number of common SNPs (minor allele frequency (MAF) greater  
102 than 0.05) in hESC is located on chromosome 6 (UCSC hg19: chr6:31492021-32932022) and  
103 has 19,431 SNPs. Not surprisingly, this TAD harbors an abundance of genes including *HLA*  
104 genes, which are well known to have many polymorphic sites [31]. However, the other human  
105 cell line (IMR90) outlier TAD is located on chromosome 8 (UCSC hg19: chr8:2132593-  
106 6252592) and has 27,220 SNPs and could be potentially biologically meaningful. Indeed,  
107 although this TAD harbors relatively few genes, it does include *CSMD1*, a gene implicated in  
108 cancer and neurological disorders such as epilepsy and schizophrenia [32,33].

109 Common SNPs were enriched near the center of TADs (**Figure 1A**). This is the opposite of  
110 gene (**Supplementary Figure S1**) and repeat element (**Supplementary Figure S2**) distributions  
111 (also see Dixon *et al.* 2012) [22]. The repeat element distribution was driven largely by the  
112 SINE/Alu repeat distribution, which could not be explained by GC content and estimated  
113 evolutionary divergence (**Supplementary Figure S3**). We also observed that common SNPs are

114 significantly enriched in the 3' half of TADs in hESC and mcortex cells (**Supplementary Table**  
115 **S1**). There was also a slight increase in GWAS implicated SNPs near hESC TAD boundaries  
116 (**Figure 1B**). Given the non-random patterns observed across the TADs, we went on to explore  
117 the gene content further in an attempt to imply causality at given GWAS loci.  
118

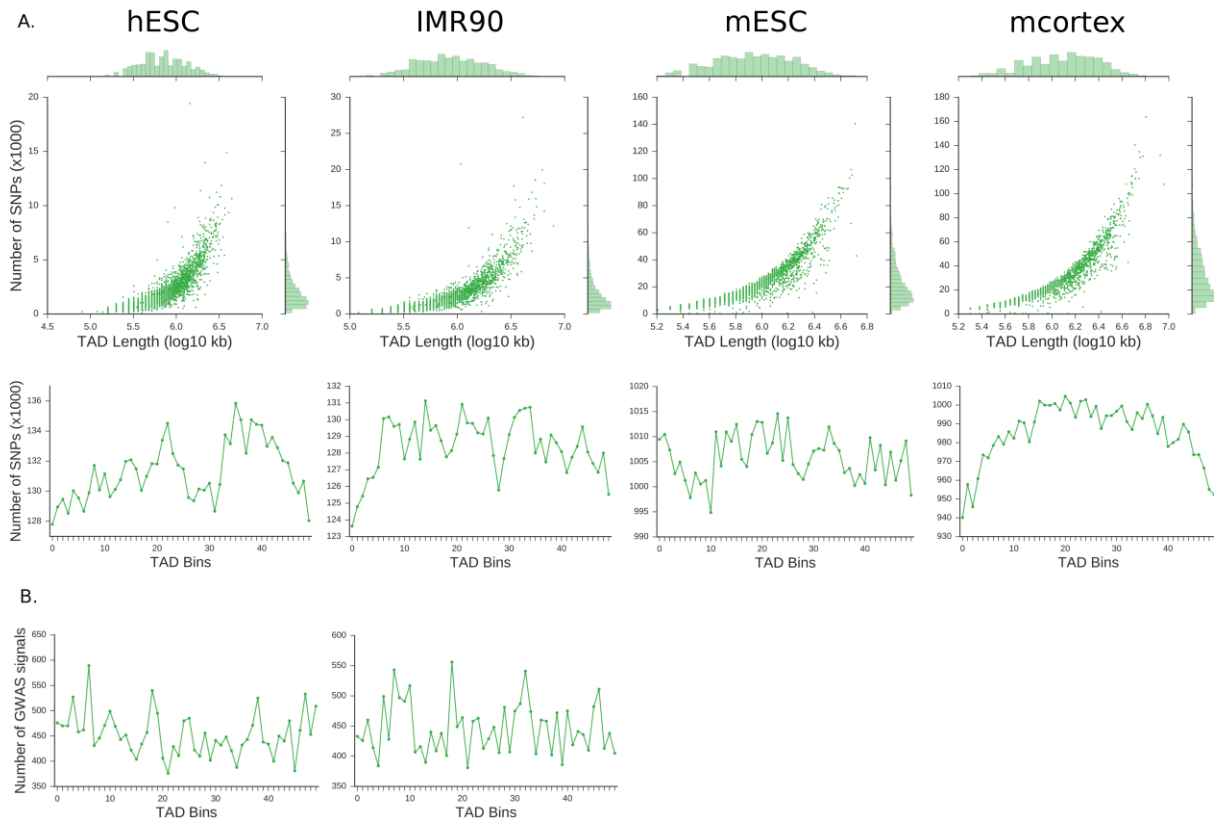

119

120 **Figure 1.** Distributions of single nucleotide polymorphisms (SNPs) across topologically  
121 associating domains of four cell types. (A) Top – The length of TADs is associated with the  
122 number of SNPs found in each cell type. Bars on the top and right side of the plots represent  
123 histograms of each respective metric. hESC and IMR90 TADs are based on 1000 genomes phase  
124 3 SNPs (hg19) and mESC and mcortex TADs represent 15 strains from the mouse genomes  
125 project version 2 (mm9). Bottom – Number of SNPs found in each cell type. (B) Number of  
126 GWAS SNPs from the NHGRI-EBI GWAS catalog that reached genome-wide significance in  
127 replication required journals. In each case, we independently discretized TADs into 50 bins  
128 where the distribution of elements is linear from 5' to 3' (bin 0 is the 5' most end of all TADs).  
129

130

131 *TAD\_Pathways reveals potentially causal genes within phenotype-associated TADs*

132 Seeking to leverage TADs and disease associated SNPs, we integrated GWAS and TAD  
133 domain boundaries in an effort to assign GWAS signals to causal genes. Alternative approaches  
134 to understand the gene landscape of a locus that do not consider TAD boundaries typically either  
135 assign genes to a GWAS signal based on nearest gene [34] or by an arbitrary or a linkage  
136 disequilibrium-based window of several kilobases [35,36] (**Figure 2A**). Instead, we used TAD  
137 boundaries and the full catalog of GWAS findings for a given trait or disease to assign genes to  
138 GWAS variants based on overrepresentation in a gene set in an approach we termed  
139 “TAD\_Pathways”. For a given trait or disease, we collected all genes that are located in TADs  
140 harboring significant GWAS signals. We then applied a statistical enrichment analysis for  
141 biological pathways using this TAD gene set and assign candidate genes within a TAD based on  
142 the pathways significantly associated with a phenotype (**Figure 2B**). In our implementation, we  
143 used GO biological processes, GO cellular components, and GO molecular functions to provide  
144 the pathway sets [37]. We included both experimentally confirmed and computationally inferred  
145 GO gene annotations, which permit the inclusion of putative casual genes that do not necessarily  
146 have literature support but are predicted by a variety of computational methods.

147 To validate our approach, we applied TAD\_Pathways to bone mineral density (BMD)  
148 GWAS results derived from replication-requiring journals [26–29]. Our method implicated  
149 ‘Skeletal System Development’ (Benjamini-Hochberg adjusted  $p = 1.02 \times 10^{-5}$ ) as the top ranked  
150 pathway. We provide full TAD\_Pathways results for BMD in **Supplementary Table S2**.  
151 Despite a high content of presumably non-causal genes, which we expect would contribute noise  
152 to the overrepresentation analysis [38], our method demonstrated enrichment of a skeletal system  
153 related pathway and selected a subset of potentially causal genes belonging to the same pathway.

154 Many of these genes (24/38) were not the nearest gene to the GWAS signal and several also had  
 155 independent expression quantitative trait loci (eQTL) support (**Supplementary Table S3,**  
 156 **Supplementary Figure S4**).

157

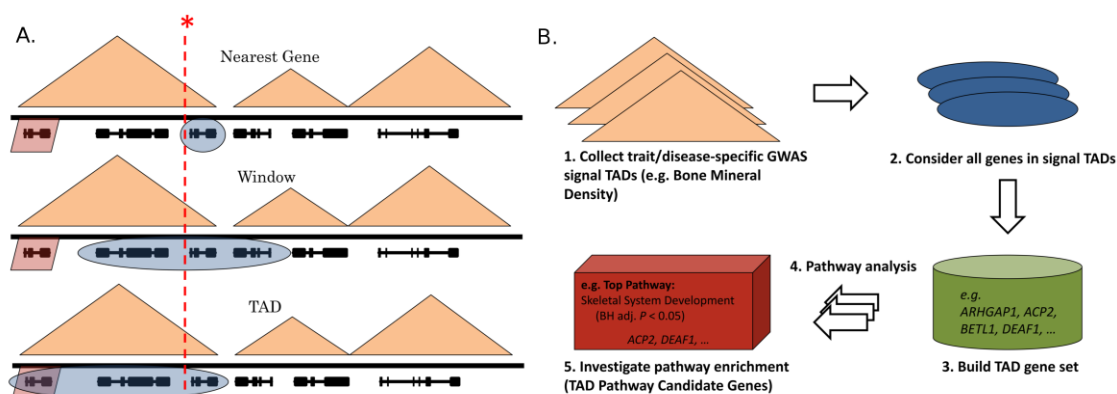

158

159 **Figure 2.** *Concepts motivating our approach.* Topologically associating domains (TADs) are  
 160 shown as orange triangles, genes are shown as black lines, and a genome wide significant  
 161 GWAS signal is shown as a dotted red line. (A) Three hypothetical examples illustrated by a  
 162 cartoon. The ground truth causal gene is shaded in red. The method-specific selected genes are  
 163 shaded in blue. The top panel describes a nearest gene approach. The nearest gene in this  
 164 scenario is not the gene actually impacted by the GWAS SNP. The middle panel describes a  
 165 window approach. Based either on linkage disequilibrium or an arbitrarily sized window,  
 166 the scenario does not capture the true gene. The bottom panel describes the TAD\_Pathways  
 167 approach. In this scenario, the causal gene is selected for downstream assessment. (B) The  
 168 TAD\_Pathways method. An example using Bone Mineral Density GWAS signals is shown.  
 169

### 170 *siRNA Knockdown of TAD Pathway Gene Predictions in Osteoblast Cells*

171 The loci rs7932354 (cytoband: 11p11.2) and rs11602954 (cytoband: 11p15.5) are currently  
 172 assigned to *ARHGAP1* and *BETL1* but our method implicated *ACP2* and *DEAF1*, respectively.  
 173 The two genes implicated by TAD\_Pathways, *ACP2* and *DEAF1*, lacked eQTL support and were  
 174 not the nearest gene to the BMD GWAS signal. We tested the gene expression activity and  
 175 metabolic importance of these four genes, *ARHGAP1*, *BETL1*, *DEAF1*, and *ACP2*. Specifically,  
 176 our assays in a human fetal osteoblast cell line (hFOB) evaluate whether or not the



177 TAD\_Pathways method identifies causal genes at GWAS signals beyond those captured by  
178 closest and eQTL connected genes. Though these two genes were annotated to the identified GO  
179 process, the annotation had been made computationally and their known biology did not provide  
180 obvious links to bone biology.

181 We targeted the expression of all four of these genes *in vitro* using small interfering RNA  
182 (siRNA), assessing knockdown efficiency at the mRNA level relative to untreated controls and  
183 determined corresponding *p* values relative to scrambled siRNA controls. We used an siRNA  
184 targeting tissue-nonspecific alkaline phosphatase (*TNAP*) as a positive control. Knockdown  
185 efficiencies were: *TNAP* siRNA 48.7±9.9% (*p*=0.141), *ARHGAP1* siRNA 68.7±14.3%  
186 (*p*=0.015), *ACP2* siRNA 48.9±6.4% (*p*=0.035), *BETIL* 56.4±1.0% (N.S.) and *DEAF1*  
187 52.7±9.2% (*p*=0.021) (**Figure 3**). siRNA targeted against each gene of interest did not down-  
188 regulate the expression of the other genes under investigation, indicating specificity of  
189 knockdown, although we noted that *TNAP* siRNA did reduce *DEAF1* gene expression, though  
190 this did not reach the threshold for statistical significance (*p*= 0.077).

191 We noted significant variation across the three controls, with the scrambled siRNA control  
192 altering expression of *OCN* (osteocalcin), *IBSP* (bone sialoprotein), *TNAP* and *BETIL* (*p* < 0.05).  
193 Relative to the scrambled siRNA control, *OCN* was downregulated in all siRNA groups (*p* <  
194 0.05) except for *BETIL* siRNA (*p* = 0.122). *OSX*, *IBSP* and *TNAP* were not significantly altered  
195 by any siRNA treatment (**Figure 3**).

196

### 197 *Metabolic Activity of TAD Pathway Gene Predictions*

198 Use of *ACP2* siRNA led to a 66.0% reduction in MTT metabolic activity versus the  
199 scrambled siRNA control (*p* = 0.012). *ARHGAP1* siRNA caused a 38.8% reduction, which fell

200 short of statistical significance ( $p = 0.088$ ). siRNA targeted against *TNAP*, *BET1L* or *DEAF1* did  
 201 not alter MTT metabolic activity (**Figure 4A**).

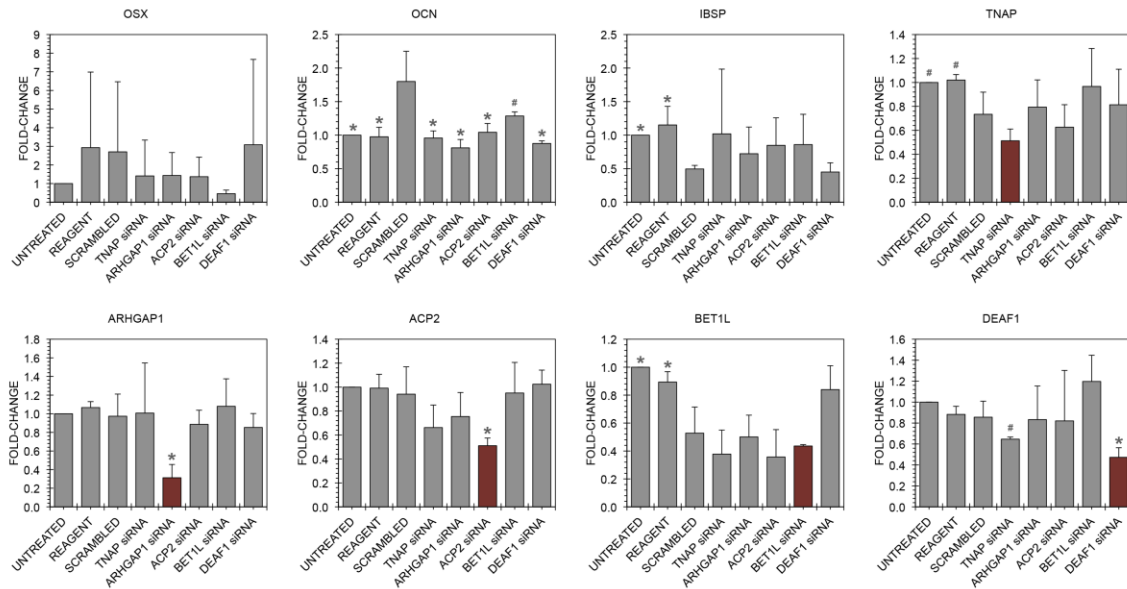

202

203 **Figure 3:** Real-time PCR of osteoblast differentiation genes and GWAS/TAD hits in hFOB cells.  
 204 siRNA was used to knock down expression of *TNAP* (positive control), *ARHGAP1*, *ACP2*,  
 205 *BET1L* and *DEAF1*. Relative expression of the osteoblast marker genes *OSX*, *OCN* and *IBSP*  
 206 suggest that GWAS/TAD hits are not major regulators of bone differentiation in this model. Red  
 207 bars highlight specificity of each siRNA knockdown. Values represent mean  $\pm$  standard  
 208 deviation. Statistical significance relative to the scrambled siRNA control is annotated as: \* $p \leq$   
 209 0.05 and # $p \leq 0.10$  using a two-tailed Student's *t*-test.

210

211

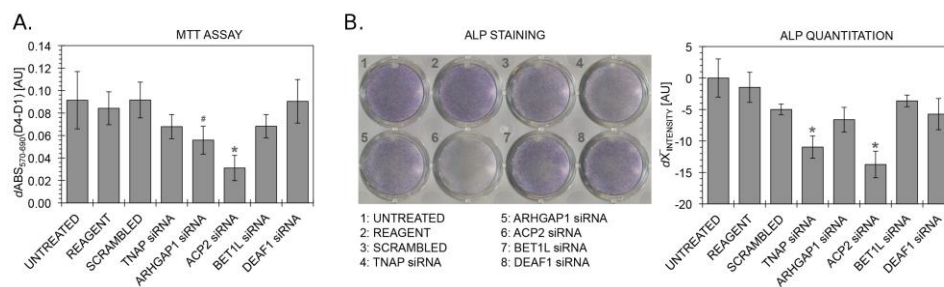

212

213 **Figure 4.** Validating two 'TAD Pathway' predictions for Bone Mineral Density GWAS hits on  
 214 hFOB cells. siRNA was used to knock down expression of *TNAP*, *ARHGAP1*, *ACP2*, *BET1L* and  
 215 *DEAF1*. (A) Knockdown of *ACP2* decreases cellular metabolic activity, demonstrated using an  
 216 MTT assay. (B) ALP staining and quantitation indicates that knockdown of *TNAP* or *ACP2*  
 217 inhibits performance in an osteoblast differentiation assay. Values represent mean  $\pm$  standard  
 218 deviation. Statistical significance relative to the scrambled siRNA control is annotated as: \* $p \leq$   
 219 0.05 and # $p \leq 0.10$  using a two-tailed Student's *t*-test.

220

## 221 *Influence of TAD\_Pathways Gene Predictions on Alkaline Phosphatase Activity*

222 Alkaline phosphatase (ALP) is highly expressed in osteoblasts; disruption of proliferation or  
223 osteoblast differentiation would result in downregulation of ALP. Treatment with siRNA  
224 resulted in changes in ALP staining that we analyzed further by quantitation. *TNAP* siRNA  
225 significantly reduced ALP by  $5.98 \pm 1.77$  versus the scrambled siRNA control ( $p = 0.006$ ). *ACP2*  
226 siRNA also significantly reduced ALP intensity by  $8.74 \pm 2.11$  versus the scrambled siRNA  
227 control ( $p = 0.003$ ). The scrambled siRNA group stained less intensely than untreated or  
228 transfection reagent control wells, but this did not reach statistical significance ( $0.05 < p < 0.10$ )  
229 **(Figure 4B)**.

230

## 231 **Discussion:**

232 We observed a nonrandom enrichment of SNPs in the center of TADs that was consistent  
233 across different cell types, but was in the opposite direction of the gene and repeat elements  
234 distributions. It is possible that the gene distribution is driving this phenomenon, since coding  
235 regions are under higher evolutionary constraint and are thus more averse to SNPs [39].  
236 Nevertheless, GWAS SNPs also appeared to be distributed closely to boundary regions in hESC  
237 cells. This may support GWAS causally implicating nearest genes more frequently since genes  
238 are also distributed near boundaries. The observation may also suggest that polymorphism in  
239 regions near TAD boundaries are more important drivers of disease risk associations than  
240 polymorphism in the center of TADs. However, we do not observe this pattern in IMR90 cells.  
241 The SNP distribution was also opposite of the SINE/Alu repeat distribution. Given that Alu  
242 elements tend to insert into GC-rich regions [40], we tracked GC content across TADs and  
243 observed only a slight increase in GC content near TAD boundaries. There was also a slightly

244 inverse distribution of Alu evolutionary divergence [40]. Our results suggest that the Alu  
245 distribution is primarily driven by intronic clustering [41] rather than GC-biased insertion or  
246 evolutionary divergence. Recently, retrotransposons have been shown to act as genomic  
247 insulators [42], while Alu repeats have been shown to be correlated with functional elements  
248 [43]. However, the relationships between polymorphic sites, repeat elements, and genes across  
249 TADs and higher level genome organization have yet to be explored in detail and warrants  
250 further investigation.

251 TAD boundaries offer a unique computational opportunity to use biologically informed  
252 windows to predefine areas of the genome that are more likely to interact with themselves. We  
253 showed, as a proof of concept, that TADs can reveal functional GWAS variant to gene  
254 relationships using BMD. Several of the TAD\_Pathways implicated genes, including *LRP5* and  
255 other Wnt signaling genes, are *bona fide* BMD genes already identified by nearest gene GWAS,  
256 eQTL analyses and human clinical syndromes [44,45], thus providing positive controls for our  
257 approach. However, several BMD GWAS signals do not have obvious nearest gene associations,  
258 which allowed us to validate our approach with two candidate causal, non-nearest gene  
259 predictions: *ACP2* and *DEAF1*. Both genes also did not have eQTL associations, but this is  
260 likely a result of the eQTL browser lacking bone tissue.

261 To assess the validity of our predictions, we experimentally knocked down *ACP2* and  
262 *DEAF1* in hFOB cells. siRNA for *ACP2* and *DEAF1* did not significantly alter expression of the  
263 osteoblast marker genes *OSX*, *IBSP* or *TNAP*. *OCN* was downregulated in each of the  
264 experimental groups relative to the scrambled siRNA control, but comparison with the reagent  
265 control indicated no significant difference in any group, suggesting an off-target effect on *OCN*  
266 in the scrambled siRNA group. Because osteoblast differentiation genes were not downregulated

267 following knockdown of the genes of interest, we concluded that these genes do not directly  
268 regulate the transcriptional processes of osteoblast differentiation *in vitro*. The decrease in  
269 *DEAF1* expression following *TNAP* siRNA treatment, though not statistically significant,  
270 suggests that *DEAF1* may function downstream of *TNAP*.

271 There was a pronounced and statistically significant reduction in metabolic activity in hFOB  
272 cells treated with *ACP2* siRNA. This result carried through to the ALP assay, in which staining  
273 intensity and ALP+ area fraction were dramatically reduced in only the *TNAP* siRNA and *ACP2*  
274 siRNA groups. The combination of these results with the gene expression data suggests that  
275 *ACP2* regulates early osteoblast proliferation/viability, but does not directly regulate osteoblast  
276 differentiation.

277 We provide evidence that our approach can steer researchers from GWAS signals toward  
278 genes relevant to the pathogenesis of the given trait. Furthermore, because our method treats all  
279 genes in implicated TADs equally, functional classification extends to the identification of single  
280 variant pleiotropic events; as was the case with an intronic *FTO* variant impacting both *IRX3* and  
281 *IRX5* [8].

282 Despite the advantages presented by TAD\_Pathways, the method has a number of  
283 limitations. Currently, our method will not overcome the possibility of a gene being  
284 inappropriately included in a pathway that it does not actually contribute to, plus all other  
285 propagated errors related to pathway curation and analyses [46]. Network based methods built on  
286 gene-gene interaction data also suffer from similar biases [47], but potentially to a lesser extent  
287 than curated pathways. We include both curated and computationally predicted GO annotations  
288 to ameliorate this bias. The computational predictions provide additional support that these genes  
289 may be important disease associated genes that we would have missed using only experimentally

290 validated pathway genes. We are also unable to implicate a gene to a trait if it is not assigned to a  
291 curated or predicted pathway, or if it does not fall within a TAD corresponding to a GWAS  
292 signal. It is also likely that our approach will not work well with every GWAS. Indeed we are  
293 implicating causality to given genes - we are not making a direct connection between the gene  
294 and the given variant. Furthermore, our method does not include the possibility of finding genes  
295 associated with a disease that is impacted by alternative looping, which has been observed to  
296 occur in cancer [48,49] and sickle cell anemia [50]. As research on 3D genome organization  
297 increases, it is likely that more diseases will include chromosome looping deficiencies as part of  
298 their etiology. Additionally, we used TAD boundaries defined by Dixon *et al.* 2012. A more  
299 recent Hi-C analysis at increased resolution substantially reduced the estimated average size of  
300 TADs [51]. Nevertheless, there remains disagreement about how TADs are defined [52]. Despite  
301 our method using larger TAD boundaries, thus promoting the inclusion of more presumably false  
302 positive genes, we retain the ability to identify biologically logical pathways. The larger  
303 boundaries permit us to screen a larger number of candidate genes but makes the method  
304 analytically conservative by increasing the pathway overrepresentation signal required to surpass  
305 the adjusted significance threshold.

306 The validation screen is also limited: it was performed in a simplified *in vitro* cell culture  
307 system lacking organismal complexity, and the cell line selected is largely tetraploid which may  
308 partially compensate for gene knockdown. This is particularly true for the lack of reduction in  
309 *TNAP* gene expression in the *TNAP* siRNA group, in light of the historical selection of the hFOB  
310 cell line based on robust ALP staining in culture [53]. As well, while the TAD approach  
311 identifies potentially several GWAS associated genes, herein we only examined two genes per  
312 TAD – one immediately adjacent to the GWAS SNP and another that we postulated could play a

313 role in the skeleton. Further work would need to systematically examine the relative importance  
314 of each gene in a TAD.

315 Other recent mechanisms and algorithms used to assign causality from association signals or  
316 enhancers to genes typically leverage multiple data types including expression [54] or epigenetic  
317 features [24]. For example, TargetFinder uses several high throughput genomic marks to identify  
318 features predictive of a chromosome physically looping together enhancers and promoters [24].  
319 Looping occurs at sub-TAD level resolutions [55] and sub-TADs are variable across cell types.  
320 Therefore, in order for a chromosome looping signature to generalize to GWAS signals, a user  
321 must assay tissue-specific and high resolution Hi-C to identify more specific interactions.  
322 Alternatively, one could also query variants that affect gene expression in high-throughput and  
323 systematically match signals to gene expression [56]. A major limitation to these approaches is  
324 that several diseases do not yet have a known tissue source or involve multiple tissues. This is  
325 particularly true for osteoporosis whereby multiple cell types, as well as systemic factors,  
326 influence bone mass [57]. Therefore, identifying these specific signals may require the  
327 procedures to be repeated across competing tissue types. In contrast, a TAD\_Pathways analysis  
328 is computationally cheap and uses publicly available TAD boundaries and GO terms as a guide  
329 for assigning genes to GWAS signals. The method is effective in a wide variety of settings and  
330 across tissues because TADs are consistent across cell types [25]. In summary, TAD\_Pathways  
331 can be used to guide researchers toward the most likely causal gene implicated by a GWAS  
332 signal. We have also identified *ACP2* as a gene involved in BMD determination, which warrants  
333 further investigation.

334

335 **Conclusions:**

336 TADs offer a novel tool in the investigation of genome function. We present an approach,  
337 called TAD\_Pathways, to leverage 3D genomics to prioritize and predict causal genes implicated  
338 by GWAS signal. At the foundation of our method is the principle that genomic regions within  
339 the same TAD more often interact with each other, and therefore, provide the genomic  
340 scaffolding that can impact gene function and gene regulation within each TAD. We applied our  
341 method to established BMD GWAS signals. By selecting two GWAS signals and two classes of  
342 genes for each signal (nearest gene and predicted gene by TAD\_Pathways), we demonstrated  
343 that our approach can causally implicate genes kilobases away from their associated GWAS  
344 signal. We validated *ACP2* (TAD prediction), but not *ARHGAP1* (nearest gene), and show that  
345 *ACP2* influences the proliferation and differentiation of osteoblast cells. We were unable to  
346 validate either *DEAF1* or *BETIL* and conclude that neither impacts osteoblast gene expression  
347 nor metabolic activity. Whether these genes influence other aspects of skeletal biology cannot be  
348 determined within the scope of the current study. Future studies focused on BMD GWAS would  
349 explore both osteoblast and osteoclast associated changes. In conclusion, as more information  
350 and data is collected regarding 3D genome principles, we propose that algorithms that leverage  
351 dynamic 3D structure rather than static linear organization will more accurately predict and  
352 discover the basic genomic biology of diseases.

353

## 354 **Methods:**

### 355 *Data Integration*

356 We used previously identified TAD boundaries for hESC, IMR90, mESC, and mcortex cells  
357 for all TAD based analyses [22,58]. To describe the genomic content of TADs, we extracted  
358 common SNPs (major allele frequency  $\leq 0.95$ ) from the 1000 Genomes Phase III data (2 May



359 2013 release) [59] and downloaded hg19 Gencode genes [60] and hg19 RepeatMasker repeat  
360 elements [61]. We downloaded hg19 FASTA files for all chromosomes as provided by the  
361 Genome Reference Consortium [62]. Furthermore, we downloaded the NHGRI-EBI GWAS  
362 catalog on 25 February 2016, which holds the significant findings of several GWAS' for over  
363 300 traits [1]. Since the GWAS catalog reports hg38 coordinates, we used the hg38 to hg19  
364 UCSC chain file [63] and PyLiftover [64] to convert genome build coordinates to hg19. We  
365 assessed relevant expression quantitative trait loci (eQTLs) using all tissues in the NCBI GTEx  
366 eQTL Browser [65].

367

### 368 *TAD\_Pathways*

369 Our TAD\_Pathways method is a light-weight approach that uses TAD boundary regions,  
370 rather than distance explicitly, to identify putative causal genes. We first build a comprehensive  
371 TAD based gene list that consists of all genes that fall inside TADs that are implicated with a  
372 GWAS signal (see **Figure 2**). This gene list assumes that all genes within each signal TAD have  
373 an equal likelihood of functional impact on the trait or disease of interest. We then input the  
374 TAD based gene list into a WebGestalt overrepresentation analysis [66]. WebGestalt is a  
375 webapp that facilitates a pathway analysis interface allowing for quick and custom gene set  
376 based analyses. We perform a pathway overrepresentation test for the input TAD based genes  
377 against GO biological process, molecular function, and cellular component terms with a  
378 background of the human genome. Specifically, this tests if the input gene set is associated with  
379 any particular GO term at a higher probability than by chance compared to background genes.  
380 We include both experimentally validated and computationally inferred genes in each GO term,  
381 which allows the method to discover associations for genes that lack literature support. We

382 consider genes that are annotated to the most significantly enriched GO term to be the associated  
383 set [65].

384

### 385 *Cell culture and siRNA transfection*

386 A human fetal osteoblast cell line (ATCC hFOB 1.19 CRL-11372) was obtained and  
387 subcultured twice at 34°C, 5% CO<sub>2</sub> and 95% relative humidity in 1:1 DMEM/F12 with 2.5mM  
388 L-glutamine without phenol red (Gibco 21041025) supplemented with 10% FBS (Atlas USDA  
389 F0500D) and 0.3mg/mL G418 sulfate (Gibco 10131035). All experiments were conducted in  
390 three temporally separated independent technical replicates from cryopreserved P2 aliquots of  
391 these cells. 48 hours prior to transfection, media was switched to a G418-free formulation.  
392 Transfections were conducted in single-cell suspension using a commercial siRNA reagent  
393 system (Santa Cruz sc-45064) according to the manufacturer's instructions, with 6μL of siRNA  
394 duplex and 4μL transfection reagent in 750μL of transfection media per 100,000 cells. Following  
395 trypsinization, cells were counted and divided into one of 8 experimental groups: 1) untreated  
396 control, 2) siRNA-negative transfection reagent control, 3) scrambled control siRNA (sc-37007),  
397 4) *TNAP* siRNA (sc-38921), 5) *ARHGAP1* siRNA (sc-96477), 6) *ACP2* siRNA (sc-96327), 7)  
398 *BETIL* siRNA (sc-97007) or 8) Suppressin (*DEAF1*) siRNA (sc-76613). Samples for RNA  
399 isolation were generated by plating 200,000 cells per well in tissue culture treated 6-well plates  
400 (Falcon 353046). Samples for MTT assay and alkaline phosphatase (ALP) staining were  
401 generated by plating 50,000 cells per well in tissue culture treated 24-well plates (Falcon  
402 353047). Cells were then switched to a 37°C incubator and transfected for 6 hours, at which  
403 point transfection cocktails were diluted with 2x hFOB media concentrate. Media was  
404 completely changed to 1x standard hFOB media 16 hours later.

405

406 *Quantitative PCR*

407 RNA was harvested at Day 4 using TRIzol (Ambion) followed by acid guanidinium  
408 thiocyanate-phenol-chloroform extraction and RNeasy (Qiagen) spin-column purification with  
409 DNase (Qiagen) then reverse-transcribed using a high-capacity RNA-to-cDNA kit (Applied  
410 Biosystems). Duplicate qPCR reactions were conducted on 20ng of whole-RNA template using  
411 SYBR Select master mix (Applied Biosystems) in an Applied Biosystems 7500 Fast Real-Time  
412 PCR System. Primers for *GAPDH*, *OSX*, *OCN* and *IBSP* were adopted from the literature and  
413 synthesized by R&D Systems. New primer sets spanning exon-exon junctions were designed for  
414 *ARHGAP1*, *ACP2*, *BETIL* and *DEAF1* using NCBI Primer Blast, verified by melt curve analysis  
415 and agarose gel electrophoresis. Sequences follow: *ARHGAP1* F-  
416 GCGGAAATGGTTGGGGATAG R-CCTTAAGAGAAACCGCGCTC (127bp), *ACP2* F-  
417 AGCGGGTTCAGCTTGTTT R-TGGCGGTACAGCAAGGTAAC (165bp), *BETIL* F-  
418 GGATGGCATGGACTCGGATT R-TCCTCTGGAGCCCAAACAC (254bp), *DEAF1* F-  
419 GGAAGGAGCAGTCCTGCGTT R-TCACCTTCTCCATCACGCTTT (195bp). Results were  
420 analyzed using the  $2^{-\text{ddCt}}$  method using GAPDH as a housekeeping gene and reported as (mean  $\pm$   
421 standard deviation) fold-change versus untreated controls. Statistical significance was  
422 determined using 2-way homoscedastic Student's t-tests versus the scrambled siRNA control,  
423 annotated using  $*p \leq 0.05$  and  $\#p \leq 0.10$ . The acronym N.S. stands for "not significant".

424

425 *MTT metabolic assay*

426 Cellular metabolism/proliferation was assessed using a commercial cell growth  
427 determination kit (Sigma CGD1). At 1 or 4 days post-transfection, media in assigned 24-well

428 plates was switched to 450 $\mu$ L hFOB media plus 50 $\mu$ L MTT solution. Cells were incubated at  
429 37°C for 3.5 hours, after which the media was aspirated and the resulting formazan crystals were  
430 solubilized in MTT solvent. Plates were shaken and read in a BioTek Synergy H1 microplate  
431 reader. Results are reported as the difference in mean absorbance at 570nm-690nm from Day 1  
432 to Day 4. Error bars represent root-mean-square standard deviation from the measurements at  
433 both days. Statistical significance was determined using 2-way homoscedastic Student's t-tests  
434 versus the scrambled siRNA control, annotated using \* $p \leq 0.05$  and # $p \leq 0.10$ .

435

#### 436 *Alkaline phosphatase (ALP) staining*

437 Plates were stained at 4 days post-transfection using a commercial ALP kit (Sigma 86C).  
438 Dried plates were then imaged at 600dpi using an Epson V370 photo scanner and staining was  
439 quantified using mean whole-well intensity measurements in ImageJ using raw output files. ALP  
440 area fraction was calculated using color thresholding. Values are reported as mean  $\pm$  standard  
441 deviation. Statistical significance was determined using 2-way homoscedastic Student's t-tests  
442 versus the scrambled siRNA control, annotated using \* $p \leq 0.05$  and # $p \leq 0.10$ . Images of plates  
443 presented as figures were edited using a warming filter and for brightness/contrast using Adobe  
444 Photoshop CS6.

445

#### 446 *Computational Reproducibility*

447 We provide all of our source code under a permissive open source license and encourage  
448 others to modify and build upon our work [67]. Additionally, we provide an accompanying  
449 docker image [68] to replicate our computational environment  
450 ([https://hub.docker.com/r/gregway/tad\\_pathways/](https://hub.docker.com/r/gregway/tad_pathways/)) [69].

451

452 **Declarations:**

453 *Ethics approval and consent to participate*

454 Not applicable.

455 *Consent for publication*

456 Not applicable.

457 *Availability of data and material*

458 All data used to construct the TAD\_Pathways approach are publically available datasets. We  
459 make all software used to develop this approach publically available in a GitHub repository  
460 ([http://github.com/greenelab/tad\\_pathways](http://github.com/greenelab/tad_pathways)). We also provide a docker image  
461 ([https://hub.docker.com/r/gregway/tad\\_pathways/](https://hub.docker.com/r/gregway/tad_pathways/)) and archive the GitHub software on  
462 Zenodo (<https://zenodo.org/record/163950>).

463 *Competing interests*

464 The authors declare no competing interests.

465 *Funding*

466 This work was supported by the Genomics and Computational Biology Graduate program at  
467 The University of Pennsylvania (to G.P.W.); the Gordon and Betty Moore Foundation's Data  
468 Driven Discovery Initiative (grant number GBMF 4552 to C.S.G); the National Institute of  
469 Dental & Craniofacial Research (grant number NIH F32DE026346 to D.W.Y.); S.F.A.G is  
470 supported by the Daniel B. Burke Endowed Chair for Diabetes Research.

471 *Authors' contributions*

472 GPW wrote the software, analyzed the data, developed the method and wrote the manuscript;  
473 DWY performed the experimental validation and wrote the manuscript; KDH performed the

474 experimental validation and wrote the manuscript; CSG analyzed the data, developed the  
475 method and wrote the manuscript; SFAG analyzed the data, developed the method and wrote  
476 the manuscript.

477 *Acknowledgements*

478 Hannah E. Sexton and Troy L. Mitchell assisted in optimizing siRNA transfection  
479 conditions. Daniel Himmelstein and Amy Campbell performed analytical code review.

480 *Authors' information (optional)*

481

482

483

484

485

486

487

488

489

490

491

492

493

494

495

496

497 **Supplementary Figures:**

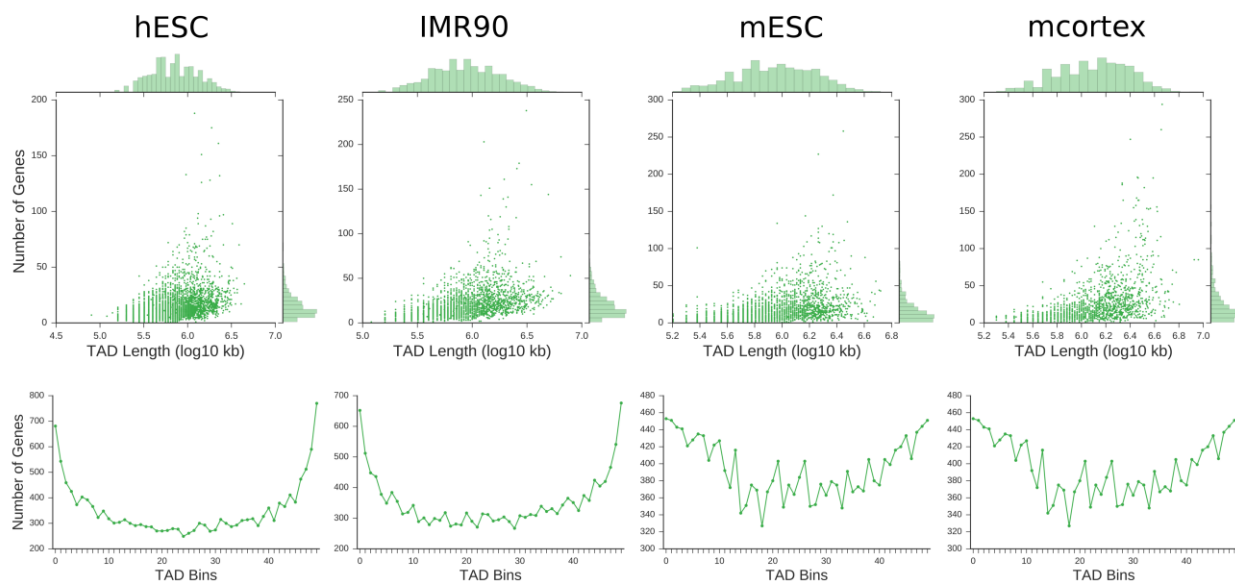

498

499 **Supplementary Figure S1:** *Distributions of genes across topologically associating domains of*  
500 *four cell types.* Bars on the top and right side of the plots represent histograms of each respective  
501 metric. We independently discretized TADs into 50 bins where the distribution of elements is  
502 linear from 5' to 3' (bin 0 is the 5' most end of all TADs).

503

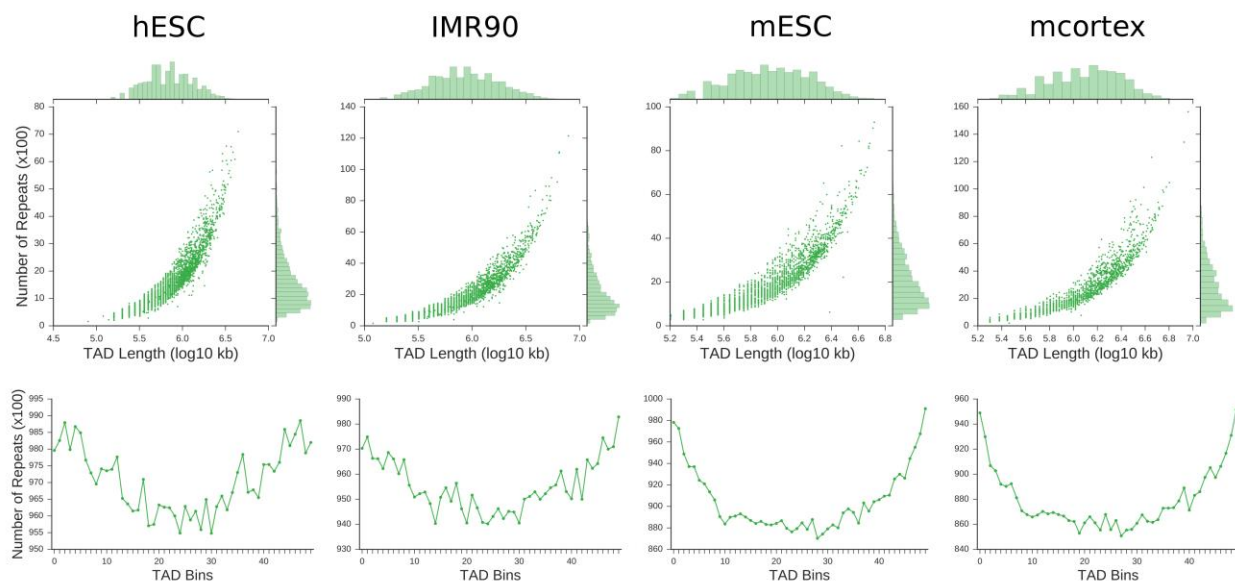

504

505 **Supplementary Figure S2:** *Distributions of all repeat elements across topologically associating*  
506 *domains of four cell types.* Bars on the top and right side of the plots represent histograms of  
507 each respective metric. We independently discretized TADs into 50 bins where the distribution  
508 of elements is linear from 5' to 3' (bin 0 is the 5' most end of all TADs).

509

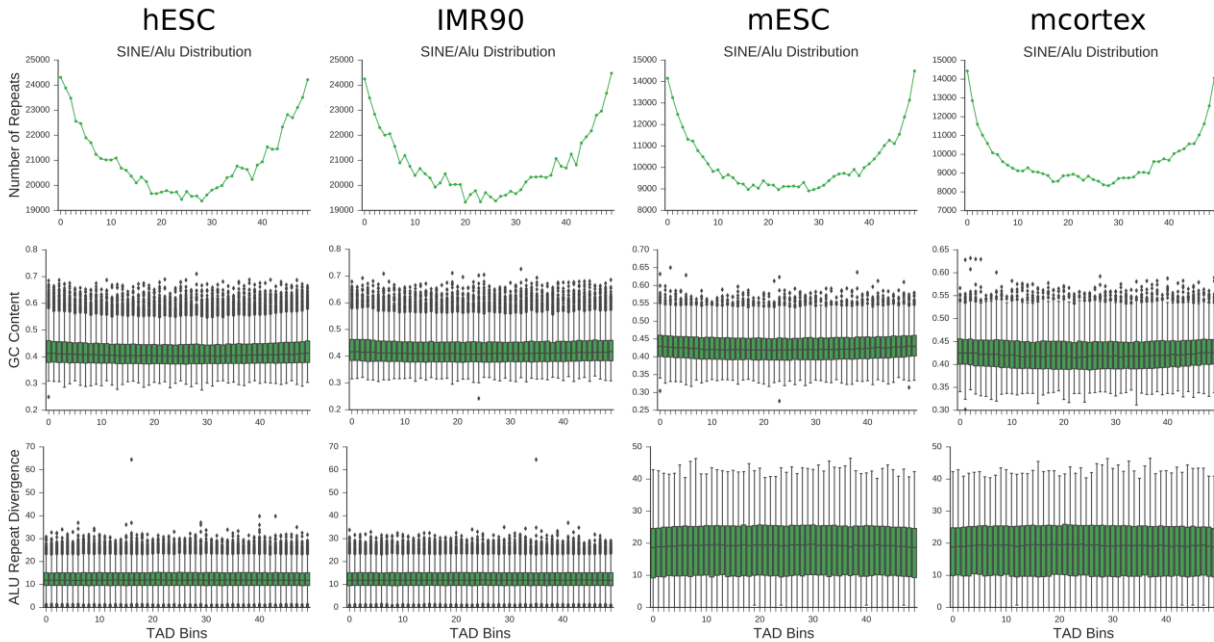

510

511 **Supplementary Figure S3:** *Distributions of SINE/Alu elements and potential confounding*  
 512 *factors across topologically associating domains of four cell types.* We independently discretized  
 513 TADs into 50 bins where the distribution of elements is linear from 5' to 3' (bin 0 is the 5' most  
 514 end of all TADs). The distribution of Alu elements is strongly clustered toward TAD boundaries  
 515 but neither the percentage of GC content across TADs nor the evolutionary divergence of Alu  
 516 elements can explain the Alu distribution.  
 517

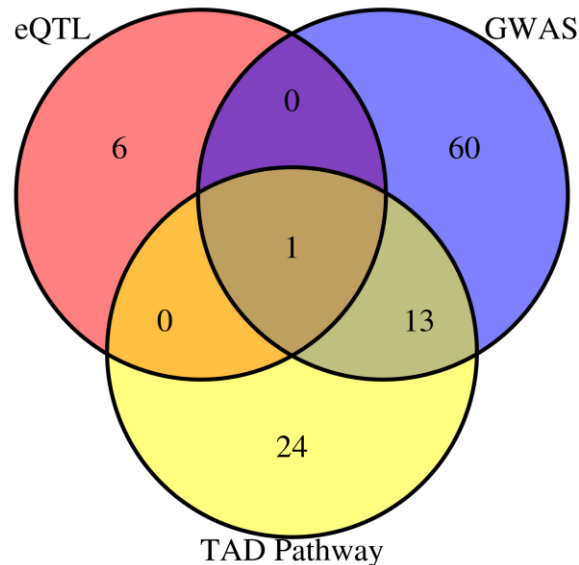

518

519

520 **Supplementary Figure S4:** *Bone Mineral Density gene counts associated with various classes*  
 521 *of evidence.* The gene *LRP5* is implicated by all evidence codes. About 1/3 of all TAD\_Pathways  
 522 implicated genes are the nearest gene implicated by the GWAS signal.



523 **Tables:**

524 **Supplementary Table S1:** *Chi square testing the enrichment of genes at TAD boundaries and*

525 *enrichment of SNPs towards the right half of TADs.*

|         | Enrichment of SNPs in the Right of TADs |          |            |         |
|---------|-----------------------------------------|----------|------------|---------|
|         | Left                                    | Right    | Chi-square | P       |
| hESC    | 3268781                                 | 3296450  | 116.6      | 3.5E-27 |
| IMR90   | 3211140                                 | 3210251  | 0.12       | 0.73    |
| mESC*   | 25161934                                | 25129279 | 21.2       | 4.1E-06 |
| mcortex | 24616532                                | 24641931 | 13.1       | 3.0E-4  |

526 \* Note- mouse embryonic stem cells have an opposite enrichment. There are more SNPs in the  
527 left of TADs

528

529 We provide **Supplementary Tables S2** and **S3** as attached .xls files.

530

531 **Abbreviations:**

532 TAD – Topologically associating domain

533 GWAS – Genome wide association study

534 SNP – Single nucleotide polymorphism

535 BMD – Bone mineral density

536 hESC – Human embryonic stem cells

537 mESC – Mouse embryonic stem cells

538 IMR90 – Human fibroblast cells

539 mcortex – Mouse cortex cells

540 siRNA – Small interfering RNA

541 eQTL – Expression quantitative trait loci

542 hFOB – Human fetal osteoblast

543 TNAP - tissue-nonspecific alkaline phosphatase

544 OCN – osteocalcin

545 IBSP – bone sialoprotein

546 ALP – Alkaline phosphatase

547 GO – Gene ontology

548 eQTL – Expression quantitative trait loci

549

550 **References:**

551 1. Welter D, MacArthur J, Morales J, Burdett T, Hall P, Junkins H, et al. The NHGRI GWAS  
552 Catalog, a curated resource of SNP-trait associations. *Nucleic Acids Res.* 2014;42:D1001–6.

553 2. Zhang F, Lupski JR. Non-coding genetic variants in human disease. *Hum. Mol. Genet.*  
554 2015;24:R102–10.

555 3. Ward LD, Kellis M. Interpreting noncoding genetic variation in complex traits and human  
556 disease. *Nat. Biotechnol.* 2012;30:1095–106.

557 4. McVean GA, Altshuler (Co-Chair) DM, Durbin (Co-Chair) RM, Abecasis GR, Bentley DR,  
558 Chakravarti A, et al. An integrated map of genetic variation from 1,092 human genomes. *Nature.*  
559 2012;491:56–65.

560 5. Brodie A, Azaria JR, Ofran Y. How far from the SNP may the causative genes be? *Nucleic*  
561 *Acids Res.* 2016;gkw500.

562 6. Tung YCL, Yeo GSH, O’Rahilly S, Coll AP. Obesity and FTO: Changing Focus at a Complex  
563 Locus. *Cell Metab.* 2014;20:710–8.

564 7. Ragvin A, Moro E, Fredman D, Navratilova P, Drivenes O, Engstrom PG, et al. Long-range  
565 gene regulation links genomic type 2 diabetes and obesity risk regions to HHEX, SOX4, and  
566 IRX3. *Proc. Natl. Acad. Sci.* 2010;107:775–80.

567 8. Claussnitzer M, Dankel SN, Kim K-H, Quon G, Meuleman W, Haugen C, et al. *FTO* Obesity  
568 Variant Circuitry and Adipocyte Browning in Humans. *N. Engl. J. Med.* 2015;373:895–907.

569 9. Smemo S, Tena JJ, Kim K-H, Gamazon ER, Sakabe NJ, Gómez-Marín C, et al. Obesity-  
570 associated variants within *FTO* form long-range functional connections with *IRX3*. *Nature.*  
571 2014;507:371–5.

- 572 10. Grant SFA, Thorleifsson G, Reynisdottir I, Benediktsson R, Manolescu A, Sainz J, et al.  
573 Variant of transcription factor 7-like 2 (TCF7L2) gene confers risk of type 2 diabetes. *Nat.*  
574 *Genet.* 2006;38:320–3.
- 575 11. Xia Q, Chesi A, Manduchi E, Johnston BT, Lu S, Leonard ME, et al. The type 2 diabetes  
576 presumed causal variant within TCF7L2 resides in an element that controls the expression of  
577 ACSL5. *Diabetologia.* 2016;59:2360–8.
- 578 12. Herman MA, Rosen ED. Making Biological Sense of GWAS Data: Lessons from the FTO  
579 Locus. *Cell Metab.* 2015;22:538–9.
- 580 13. Dekker J, Rippe K, Dekker M, Kleckner N. Capturing chromosome conformation. *Science.*  
581 2002;295:1306–11.
- 582 14. Dekker J. Gene Regulation in the Third Dimension. *Science.* 2008;319:1793–4.
- 583 15. Lieberman-Aiden E, van Berkum NL, Williams L, Imakaev M, Ragozy T, Telling A, et al.  
584 Comprehensive Mapping of Long-Range Interactions Reveals Folding Principles of the Human  
585 Genome. *Science.* 2009;326:289–93.
- 586 16. Duan Z, Andronescu M, Schutz K, McIlwain S, Kim YJ, Lee C, et al. A three-dimensional  
587 model of the yeast genome. *Nature.* 2010;465:363–7.
- 588 17. Phillips-Cremins JE, Sauria MEG, Sanyal A, Gerasimova TI, Lajoie BR, Bell JSK, et al.  
589 Architectural Protein Subclasses Shape 3D Organization of Genomes during Lineage  
590 Commitment. *Cell.* 2013;153:1281–95.
- 591 18. Sexton T, Yaffe E, Kenigsberg E, Bantignies F, Leblanc B, Hoichman M, et al. Three-  
592 Dimensional Folding and Functional Organization Principles of the Drosophila Genome. *Cell.*  
593 2012;148:458–72.
- 594 19. Symmons O, Uslu VV, Tsujimura T, Ruf S, Nassari S, Schwarzer W, et al. Functional and  
595 topological characteristics of mammalian regulatory domains. *Genome Res.* 2014;24:390–400.
- 596 20. Pope BD, Ryba T, Dileep V, Yue F, Wu W, Denas O, et al. Topologically associating  
597 domains are stable units of replication-timing regulation. *Nature.* 2014;515:402–5.
- 598 21. Gurudatta B, Yang J, Van Bortle K, Donlin-Asp P, Corces V. Dynamic changes in the  
599 genomic localization of DNA replication-related element binding factor during the cell cycle.  
600 *Cell Cycle.* 2013;12:1605–15.
- 601 22. Dixon JR, Selvaraj S, Yue F, Kim A, Li Y, Shen Y, et al. Topological domains in  
602 mammalian genomes identified by analysis of chromatin interactions. *Nature.* 2012;485:376–80.
- 603 23. Nora EP, Dekker J, Heard E. Segmental folding of chromosomes: A basis for structural and  
604 regulatory chromosomal neighborhoods?: Prospects & Overviews. *BioEssays.*  
605 2013;35:818–28.

- 606 24. Whalen S, Truty RM, Pollard KS. Enhancer–promoter interactions are encoded by complex  
607 genomic signatures on looping chromatin. *Nat. Genet.* 2016;48:488–96.
- 608 25. Smith EM, Lajoie BR, Jain G, Dekker J. Invariant TAD Boundaries Constrain Cell-Type-  
609 Specific Looping Interactions between Promoters and Distal Elements around the CFTR Locus.  
610 *Am. J. Hum. Genet.* 2016;98:185–201.
- 611 26. Richards JB, Rivadeneira F, Inouye M, Pastinen TM, Soranzo N, Wilson SG, et al. Bone  
612 mineral density, osteoporosis, and osteoporotic fractures: a genome-wide association study.  
613 *Lancet Lond. Engl.* 2008;371:1505–12.
- 614 27. Rivadeneira F, Styrkársdóttir U, Estrada K, Halldórsson BV, Hsu Y-H, Richards JB, et al.  
615 Twenty bone-mineral-density loci identified by large-scale meta-analysis of genome-wide  
616 association studies. *Nat. Genet.* 2009;41:1199–206.
- 617 28. Estrada K, Styrkarsdóttir U, Evangelou E, Hsu Y-H, Duncan EL, Ntzani EE, et al. Genome-  
618 wide meta-analysis identifies 56 bone mineral density loci and reveals 14 loci associated with  
619 risk of fracture. *Nat. Genet.* 2012;44:491–501.
- 620 29. Styrkarsdóttir U, Thorleifsson G, Sulem P, Gudbjartsson DF, Sigurdsson A, Jonasdóttir A, et  
621 al. Nonsense mutation in the LGR4 gene is associated with several human diseases and other  
622 traits. *Nature.* 2013;497:517–20.
- 623 30. Hendrickx G, Boudin E, Van Hul W. A look behind the scenes: the risk and pathogenesis of  
624 primary osteoporosis. *Nat. Rev. Rheumatol.* 2015;11:462–74.
- 625 31. Choo SY. The HLA System: Genetics, Immunology, Clinical Testing, and Clinical  
626 Implications. *Yonsei Med. J.* 2007;48:11.
- 627 32. Håvik B, Le Hellard S, Rietschel M, Lybæk H, Djurovic S, Mattheisen M, et al. The  
628 Complement Control-Related Genes CSMD1 and CSMD2 Associate to Schizophrenia. *Biol.*  
629 *Psychiatry.* 2011;70:35–42.
- 630 33. Kwon E, Wang W, Tsai L-H. Validation of schizophrenia-associated genes CSMD1,  
631 C10orf26, CACNA1C and TCF4 as miR-137 targets. *Mol. Psychiatry.* 2013;18:11–2.
- 632 34. Wang K, Li M, Bucan M. Pathway-Based Approaches for Analysis of Genomewide  
633 Association Studies. *Am. J. Hum. Genet.* 2007;81:1278–83.
- 634 35. Hao K, Di X, Cawley S. LdCompare: rapid computation of single- and multiple-marker  $r^2$   
635 and genetic coverage. *Bioinformatics.* 2007;23:252–4.
- 636 36. Taşan M, Musso G, Hao T, Vidal M, MacRae CA, Roth FP. Selecting causal genes from  
637 genome-wide association studies via functionally coherent subnetworks. *Nat. Methods.*  
638 2014;12:154–9.
- 639 37. Ashburner M, Ball CA, Blake JA, Botstein D, Butler H, Cherry JM, et al. Gene Ontology:  
640 tool for the unification of biology. *Nat. Genet.* 2000;25:25–9.

- 641 38. Petersen A, Alvarez C, DeClaire S, Tintle NL. Assessing Methods for Assigning SNPs to  
642 Genes in Gene-Based Tests of Association Using Common Variants. Chen L, editor. PLoS ONE.  
643 2013;8:e62161.
- 644 39. Mu XJ, Lu ZJ, Kong Y, Lam HYK, Gerstein MB. Analysis of genomic variation in non-  
645 coding elements using population-scale sequencing data from the 1000 Genomes Project.  
646 Nucleic Acids Res. 2011;39:7058–76.
- 647 40. Jurka J, Kohany O, Pavlicek A, Kapitonov VV, Jurka MV. Duplication, coclustering, and  
648 selection of human Alu retrotransposons. Proc. Natl. Acad. Sci. 2004;101:1268–72.
- 649 41. Deininger P. Alu elements: know the SINEs. Genome Biol. 2011;12:236.
- 650 42. Wang J, Vicente-García C, Seruggia D, Moltó E, Fernandez-Miñán A, Neto A, et al. MIR  
651 retrotransposon sequences provide insulators to the human genome. Proc. Natl. Acad. Sci.  
652 2015;112:E4428–37.
- 653 43. Gu Z, Jin K, Crabbe MJC, Zhang Y, Liu X, Huang Y, et al. Enrichment analysis of Alu  
654 elements with different spatial chromatin proximity in the human genome. Protein Cell.  
655 2016;7:250–66.
- 656 44. Baron R, Kneissel M. WNT signaling in bone homeostasis and disease: from human  
657 mutations to treatments. Nat. Med. 2013;19:179–92.
- 658 45. Krishnan V, Bryant HU, Macdougald OA. Regulation of bone mass by Wnt signaling. J.  
659 Clin. Invest. 2006;116:1202–9.
- 660 46. Khatri P, Sirota M, Butte AJ. Ten Years of Pathway Analysis: Current Approaches and  
661 Outstanding Challenges. Ouzounis CA, editor. PLoS Comput. Biol. 2012;8:e1002375.
- 662 47. Reguly T, Breitkreutz A, Boucher L, Breitkreutz B-J, Hon GC, Myers CL, et al.  
663 Comprehensive curation and analysis of global interaction networks in *Saccharomyces*  
664 *cerevisiae*. J. Biol. 2006;5:11.
- 665 48. Corces MR, Corces VG. The three-dimensional cancer genome. Curr. Opin. Genet. Dev.  
666 2016;36:1–7.
- 667 49. Flavahan WA, Drier Y, Liau BB, Gillespie SM, Venteicher AS, Stemmer-Rachamimov AO,  
668 et al. Insulator dysfunction and oncogene activation in IDH mutant gliomas. Nature.  
669 2015;529:110–4.
- 670 50. Deng W, Lee J, Wang H, Miller J, Reik A, Gregory PD, et al. Controlling long-range  
671 genomic interactions at a native locus by targeted tethering of a looping factor. Cell.  
672 2012;149:1233–44.
- 673 51. Rao SSP, Huntley MH, Durand NC, Stamenova EK, Bochkov ID, Robinson JT, et al. A 3D  
674 Map of the Human Genome at Kilobase Resolution Reveals Principles of Chromatin Looping.  
675 Cell. 2014;159:1665–80.

- 676 52. Bonev B, Cavalli G. Organization and function of the 3D genome. *Nat. Rev. Genet.*  
677 2016;17:661–78.
- 678 53. Harris SA, Enger RJ, Riggs BL, Spelsberg TC. Development and characterization of a  
679 conditionally immortalized human fetal osteoblastic cell line. *J. Bone Miner. Res. Off. J. Am.*  
680 *Soc. Bone Miner. Res.* 1995;10:178–86.
- 681 54. Zhu Z, Zhang F, Hu H, Bakshi A, Robinson MR, Powell JE, et al. Integration of summary  
682 data from GWAS and eQTL studies predicts complex trait gene targets. *Nat. Genet.*  
683 2016;48:481–7.
- 684 55. Downen JM, Fan ZP, Hnisz D, Ren G, Abraham BJ, Zhang LN, et al. Control of Cell Identity  
685 Genes Occurs in Insulated Neighborhoods in Mammalian Chromosomes. *Cell.* 2014;159:374–  
686 87.
- 687 56. Tewhey R, Kotliar D, Park DS, Liu B, Winnicki S, Reilly SK, et al. Direct Identification of  
688 Hundreds of Expression-Modulating Variants using a Multiplexed Reporter Assay. *Cell.*  
689 2016;165:1519–29.
- 690 57. Lupsa BC, Insogna K. Bone Health and Osteoporosis. *Endocrinol. Metab. Clin. North Am.*  
691 2015;44:517–30.
- 692 58. Ho JWK, Jung YL, Liu T, Alver BH, Lee S, Ikegami K, et al. Comparative analysis of  
693 metazoan chromatin organization. *Nature.* 2014;512:449–52.
- 694 59. 1000 Genomes Project Consortium, Auton A, Brooks LD, Durbin RM, Garrison EP, Kang  
695 HM, et al. A global reference for human genetic variation. *Nature.* 2015;526:68–74.
- 696 60. Harrow J, Frankish A, Gonzalez JM, Tapanari E, Diekhans M, Kokocinski F, et al.  
697 GENCODE: The reference human genome annotation for The ENCODE Project. *Genome Res.*  
698 2012;22:1760–74.
- 699 61. Smit A, Hubley R, Green P. RepeatMasker Open-4.0 [Internet]. Available from:  
700 <http://www.repeatmasker.org>
- 701 62. Church DM, Schneider VA, Graves T, Auger K, Cunningham F, Bouk N, et al. Modernizing  
702 Reference Genome Assemblies. *PLoS Biol.* 2011;9:e1001091.
- 703 63. Kent WJ, Sugnet CW, Furey TS, Roskin KM, Pringle TH, Zahler AM, et al. The Human  
704 Genome Browser at UCSC. *Genome Res.* 2002;12:996–1006.
- 705 64. Tretyakov K. pyliftover [Internet]. 2014. Available from:  
706 <https://github.com/konstantint/pyliftover>
- 707 65. GTEx Consortium. The Genotype-Tissue Expression (GTEx) project. *Nat. Genet.*  
708 2013;45:580–5.

- 709 66. Wang J, Duncan D, Shi Z, Zhang B. WEB-based GEne SeT AnaLysis Toolkit (WebGestalt):  
710 update 2013. *Nucleic Acids Res.* 2013;41:W77–83.
- 711 67. Gregory Way, Casey Green. Greenelab/Tad\_Pathways: Pre-Release. 2016 [cited 2016 Nov  
712 14]; Available from: <https://doi.org/10.5281/zenodo.163950>
- 713 68. Boettiger C. An introduction to Docker for reproducible research. *ACM SIGOPS Oper. Syst.*  
714 *Rev.* 2015;49:71–9.
- 715 69. Gregory Way, Struan Grant, Casey Greene. TAD Pathways Archived Docker Image. 2016  
716 [cited 2016 Nov 14]; Available from: <https://doi.org/10.5281/zenodo.166556>
- 717
